# Supplementary material for: β-caryolane derivatives as novel anti-colorectal cancer agents: synthesis and in vitro biological evaluation
Source: Royal Society of Chemistry journal article supplement (doi:10.1039/d5ra07312j), 2025-01-01

# Marker (Thermo 26616)

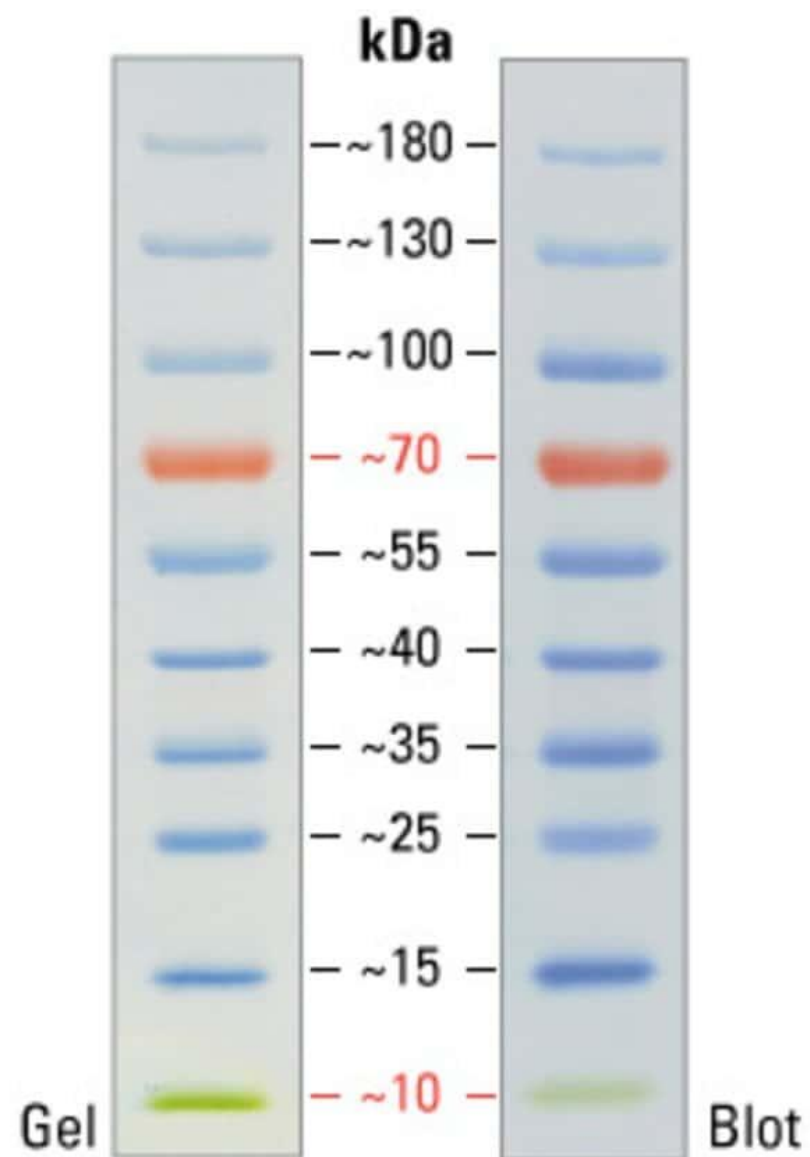

# Gel lane sequence

After treatment with DMSO and **NC-19**, the HT-29 cells were lysed with RIPA. Three triplicated DMSO samples were named as DMSO-1, DMSO-2, DMSO-3. **NC-19** treated samples were named as 5μM **NC-19**-1, 5μM **NC-19**-2, 5μM **NC-19**-3, 10μM **NC-19**-1, 10μM **NC-19**-2, 10μM **NC-19**-3, 20μM **NC-19**-1, 20μM **NC-19**-2 and 20μM **NC-19**-3.

All gels share the same lane sequence, as shown below

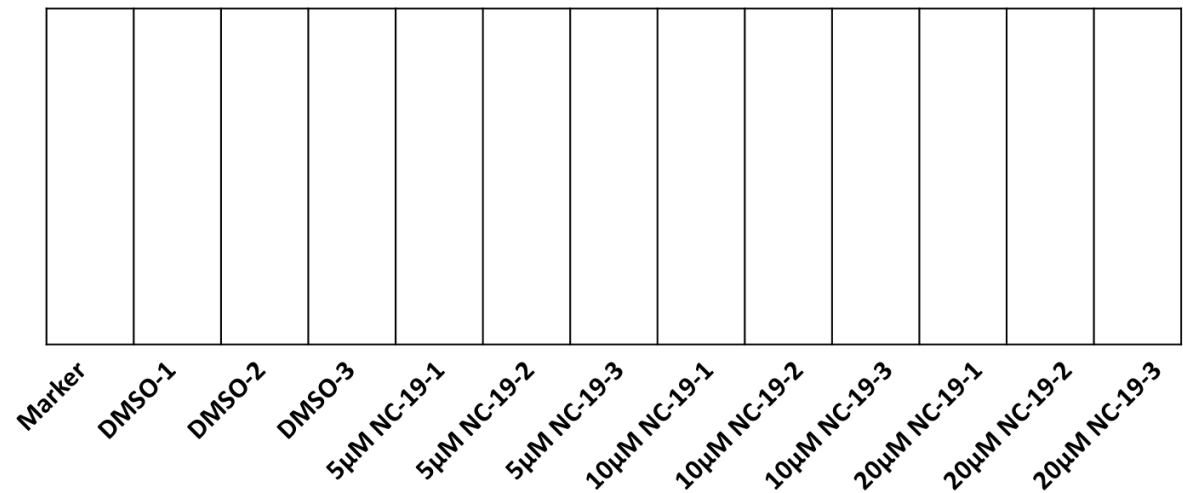

After membrane transferred, we cut the gel into two parts by molecular weight, the first half part(**IOP Gel**) was incubated with IOP (Interest Of Protein) primary antibody, the second half part(**ICP Gel**) was incubated with ICP(Internal Control Protein) primary antibody (GAPDH, Tubulin, Calnexin). Then two parts of gel were incubated with secondary antibody after wash, then analysis by ChemiDoc™ XRS+(Bio-Rad).

## Figure-2F Cleaved-Caspase-3 (35kda)

Cleaved-Caspase-3 blot image  
presented in Figure 2F of manuscript

25kda Marker ←

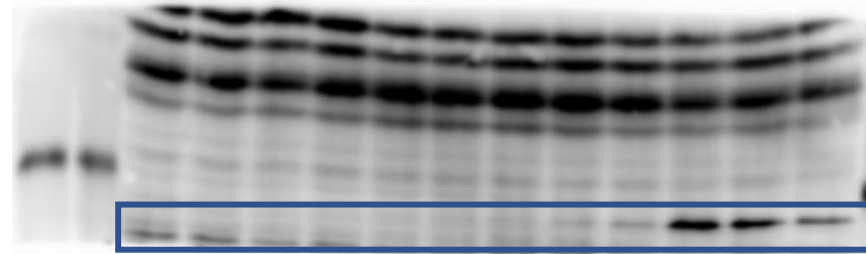

IOP Gel Chemiluminescence Image

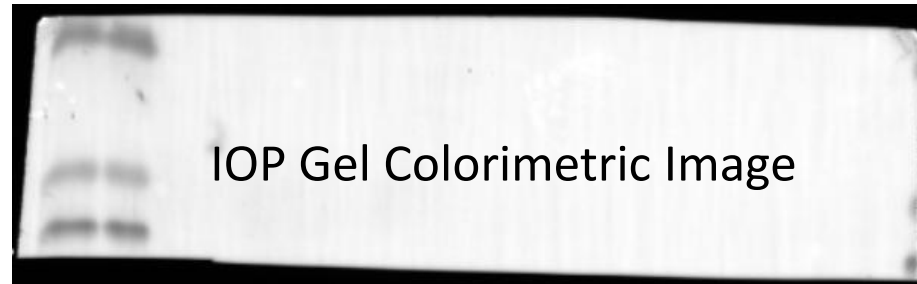

IOP Gel Colorimetric Image

**Figure 2F Cleaved-Caspase-3-Calnexin(90kda)**

70kda Marker ←

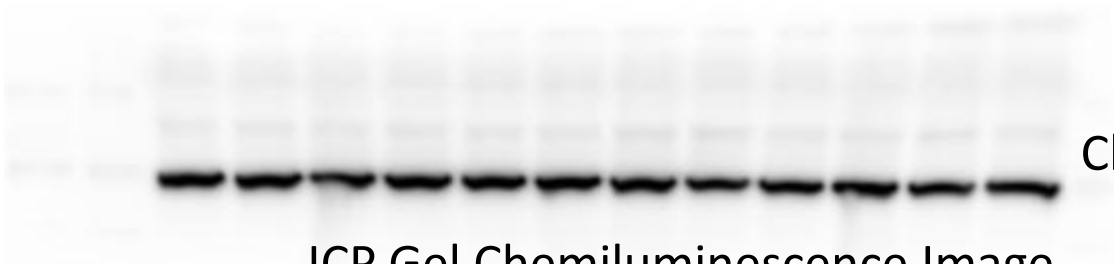

Cleaved-Caspase-3 control blot image

ICP Gel Chemiluminescence Image

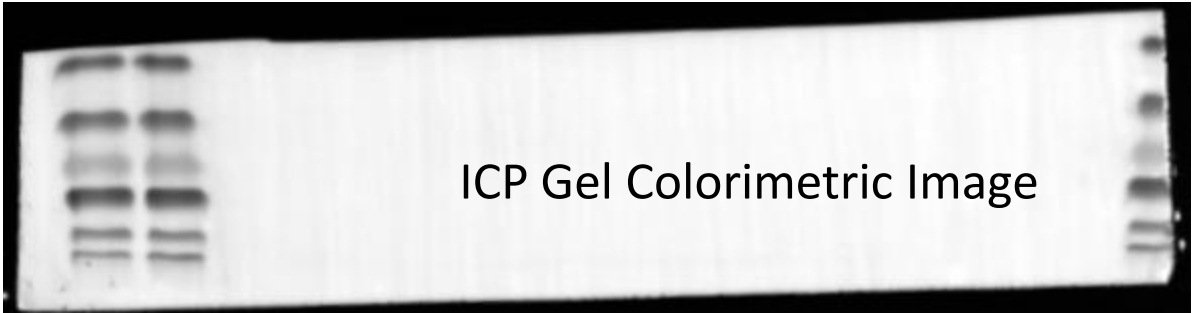

ICP Gel Colorimetric Image

**Figure 2F Cleaved-Caspase-3 merged gel Colorimetric image**

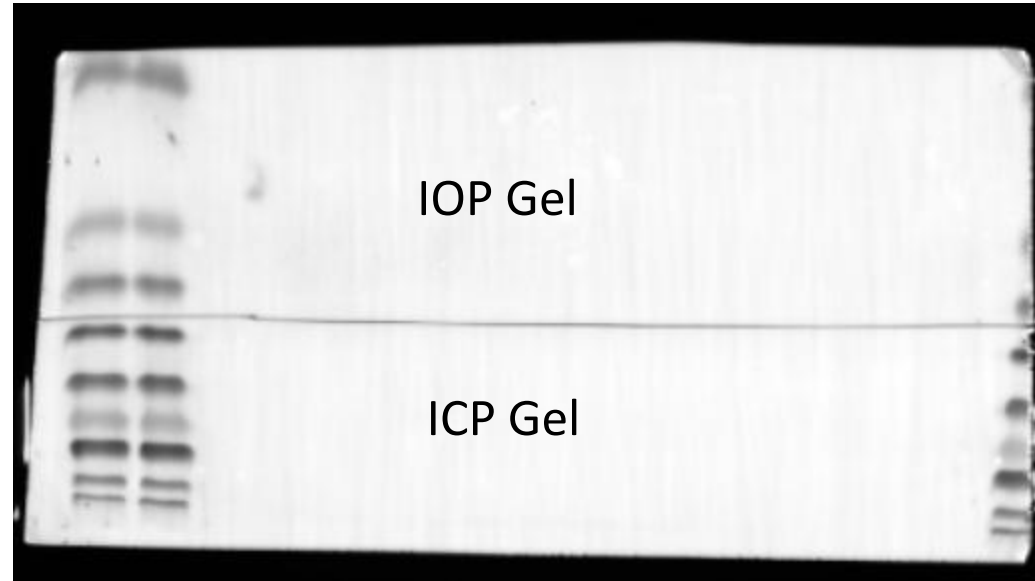

# Figure 2F Caspase-3 (35kda)

Caspase-3 blot image presented in Figure 2F of manuscript

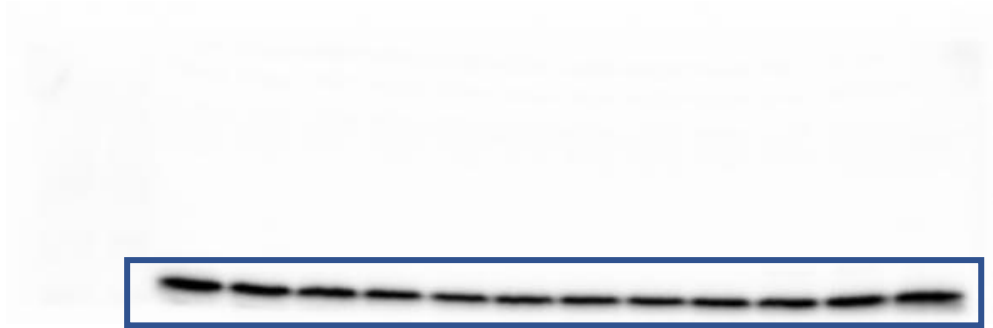

IOP Gel Chemiluminescence Image

→ Caspase-3

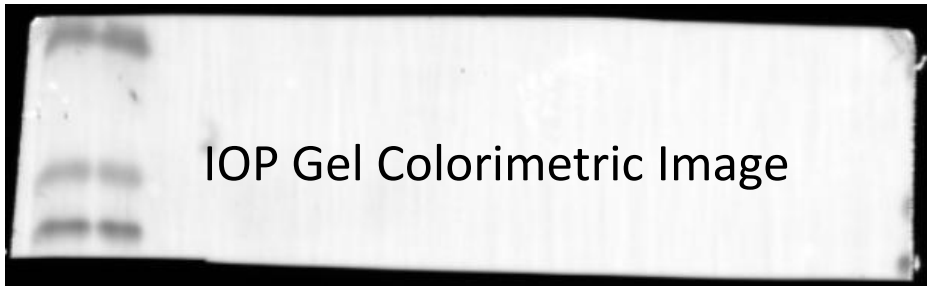

25kda Marker ←

IOP Gel Colorimetric Image

After developing the bands for Cleaved Caspase-3, the gel was stripped using Fast Western Blot Antibody Stripping Buffer and subsequently reprobed for Caspase-3.

**Figure 2F Caspase-3-Calnexin (90kda)**

70kda Marker

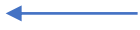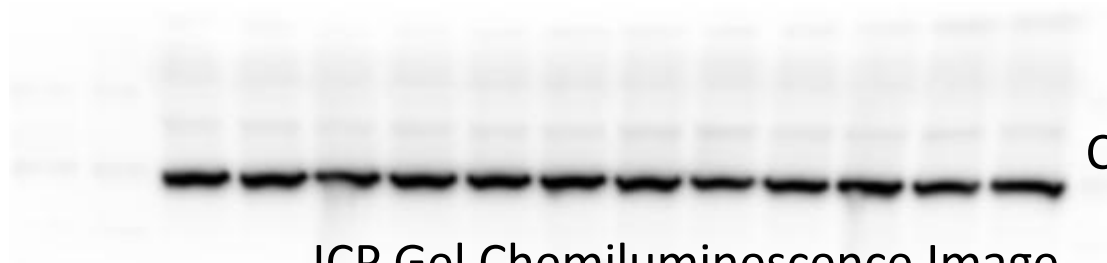

Caspase-3 control blot image

ICP Gel Chemiluminescence Image

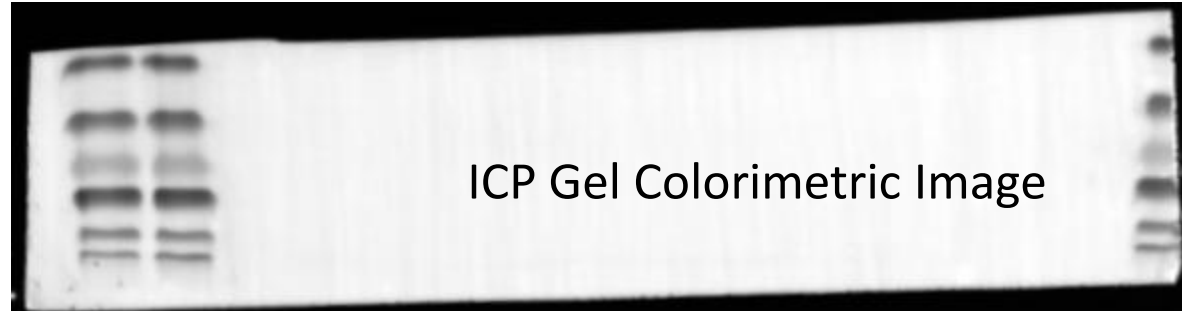

ICP Gel Colorimetric Image

**Figure 2F Caspase-3 merged gel Colorimetric image**

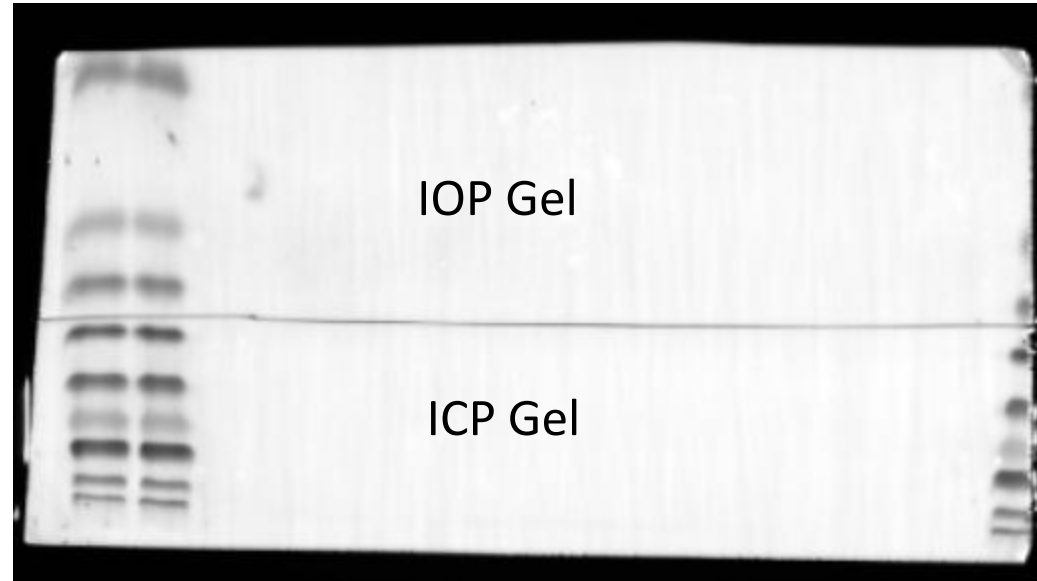



**Figure 2F Cleaved-PARP1 (116kda)**

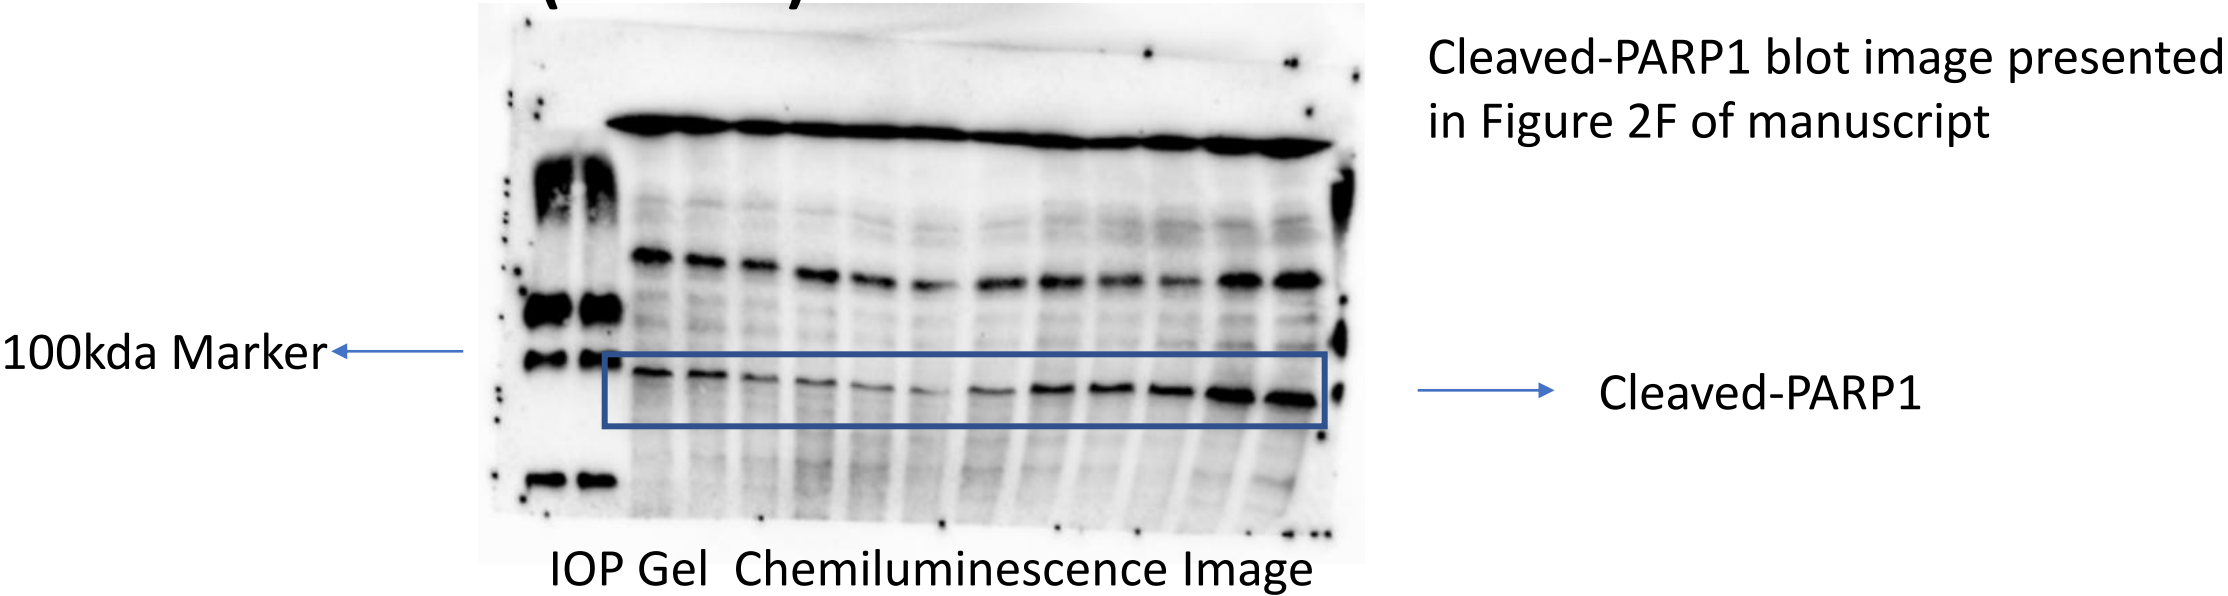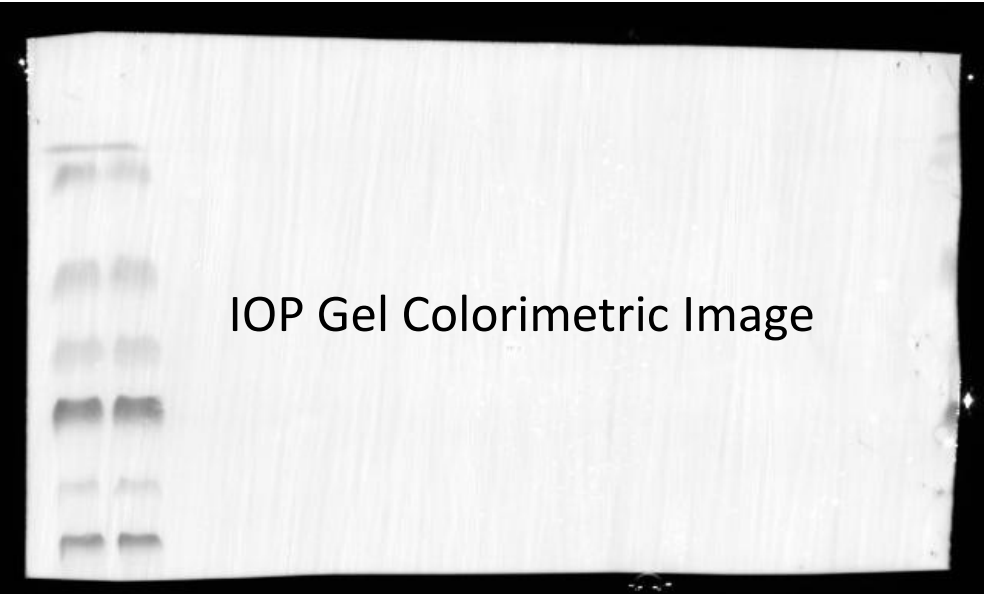

## Figure 2F Cleaved-PARP1- Calnexin (90kda)

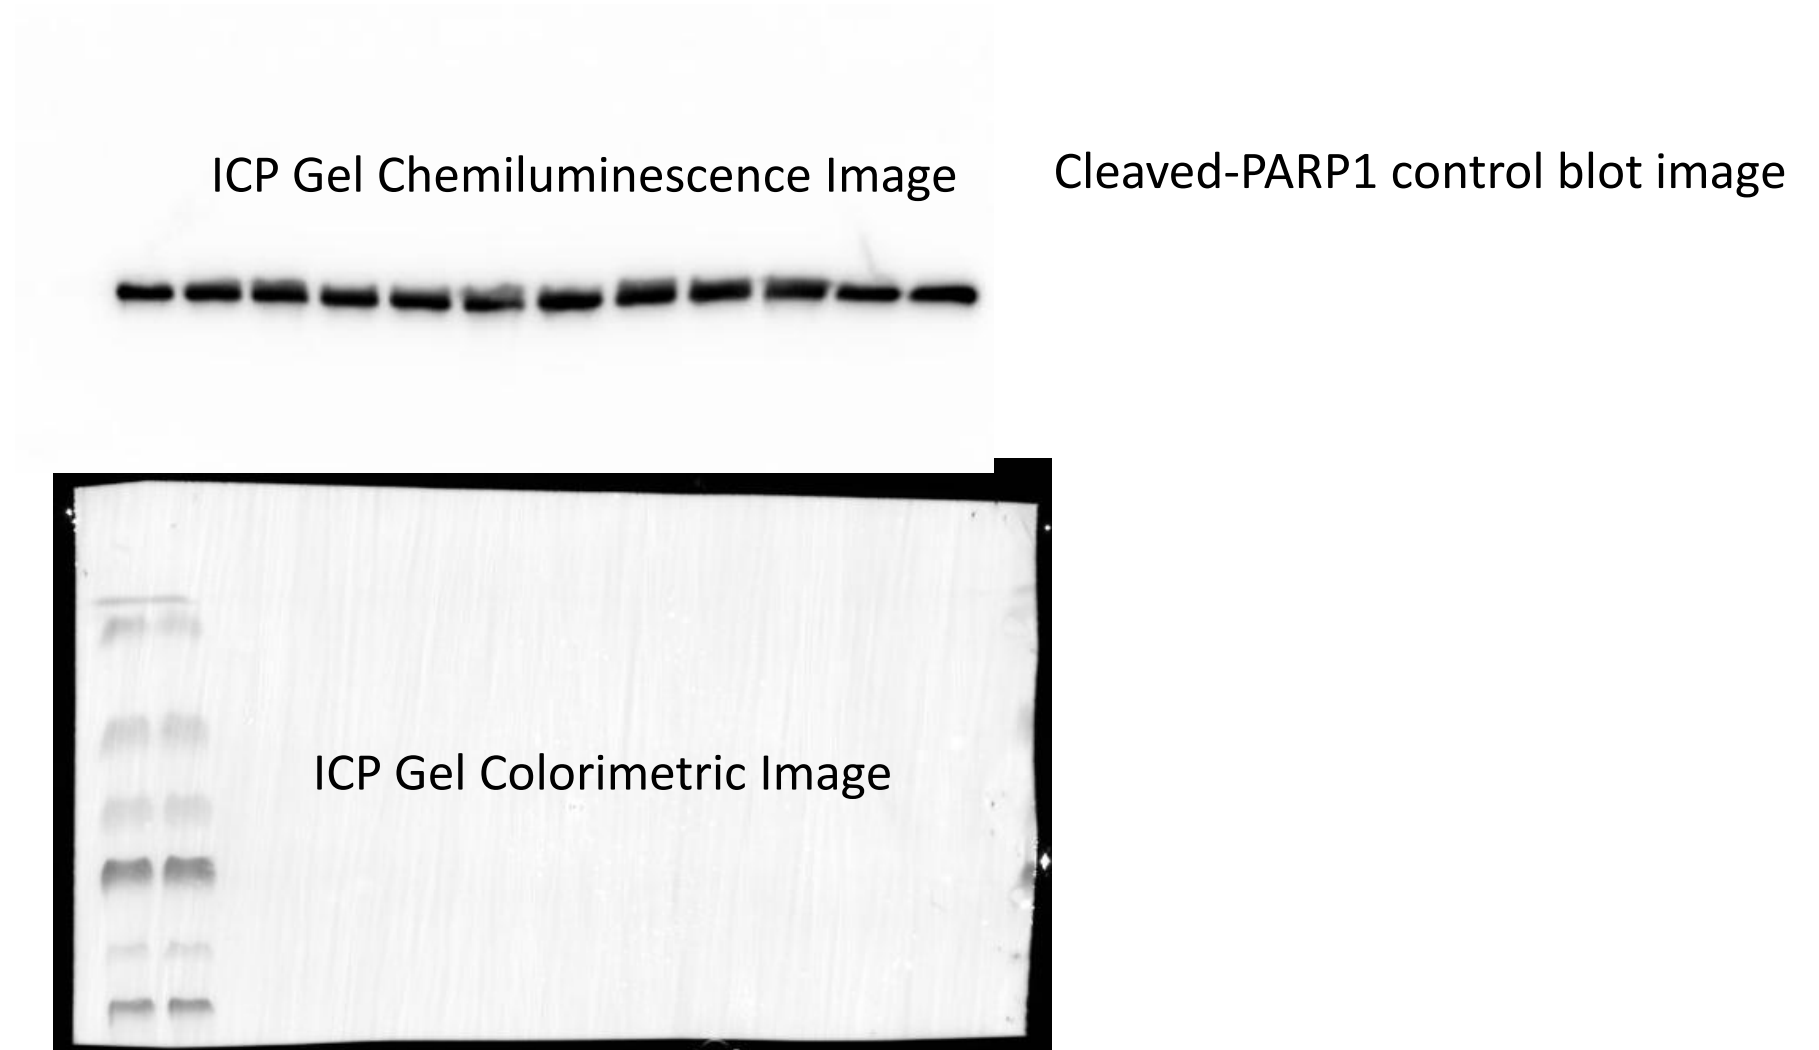

After developing the bands for Cleaved-PARP1, the gel was stripped using Fast Western Blot Antibody Stripping Buffer and subsequently reprobed for Calnexin.

## Figure 2F PARP1 (116kda)

PARP blot image presented in Figure 2F of manuscript

100kda Marker

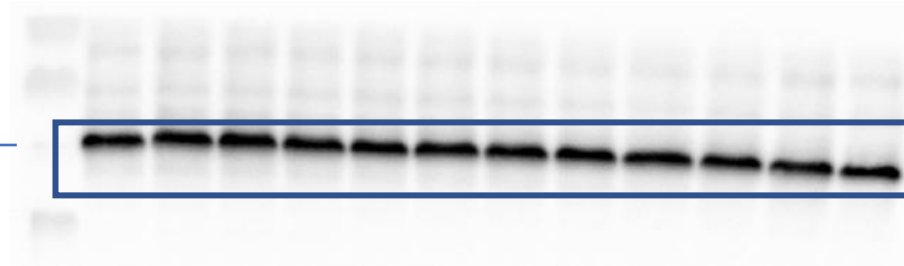

IOP Gel Chemiluminescence Image

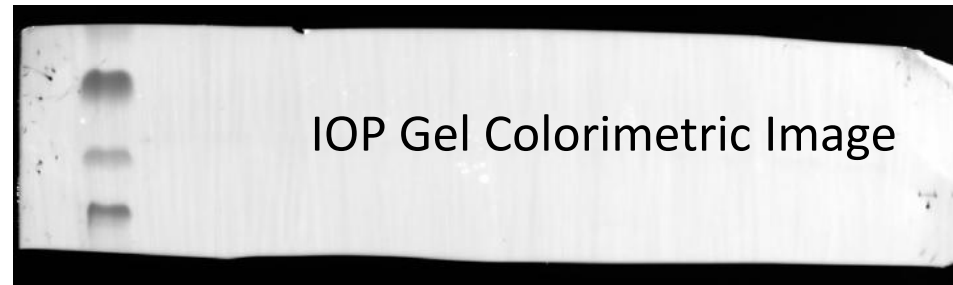

IOP Gel Colorimetric Image

**Figure 2F PARP1-Tubulin (55kda)**

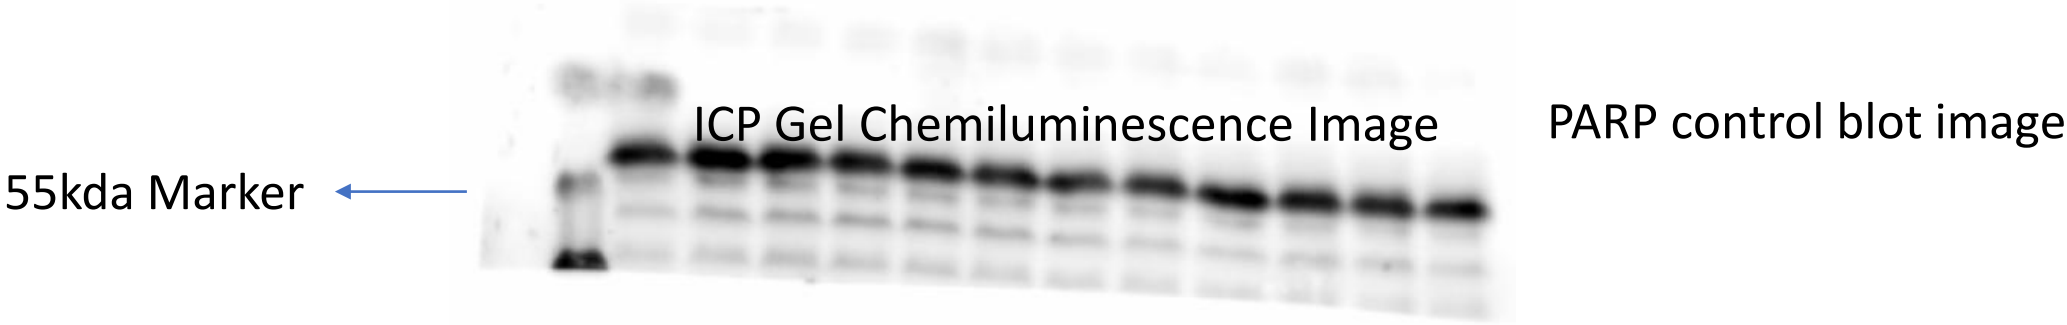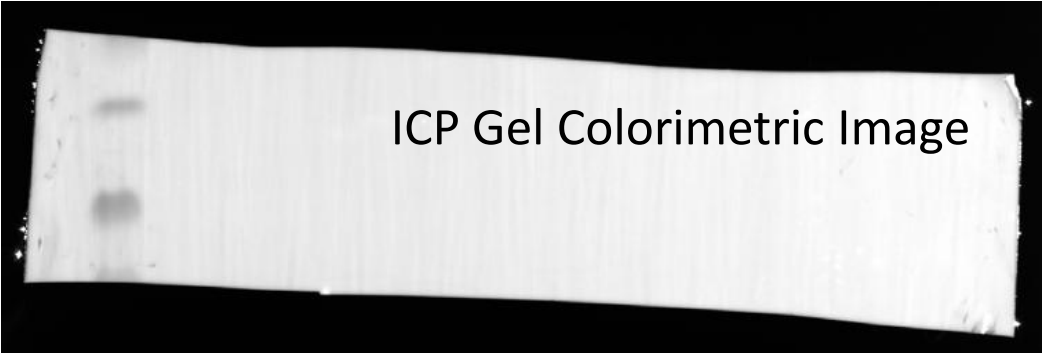

**Figure 2F PARP1 merged gel Colorimetric image**

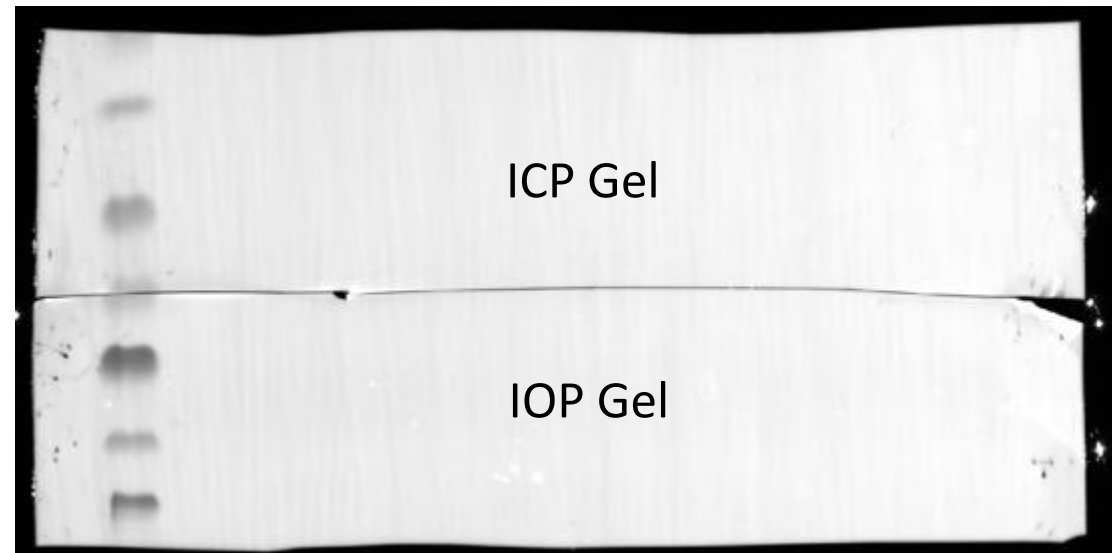

## Figure 3C CDK2 (33kda)

CDK2 blot image presented in Figure 3C of manuscript

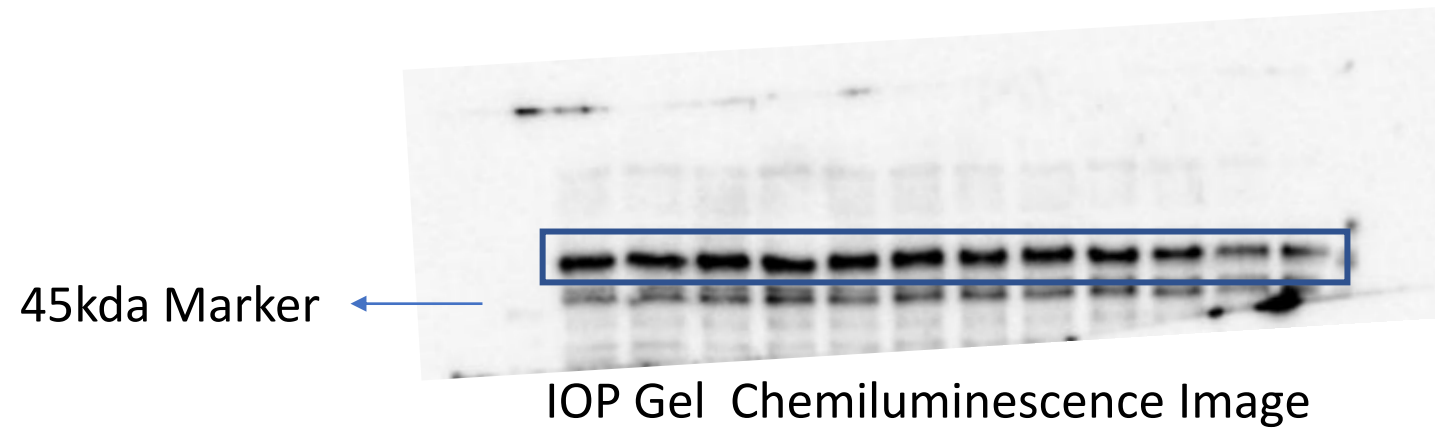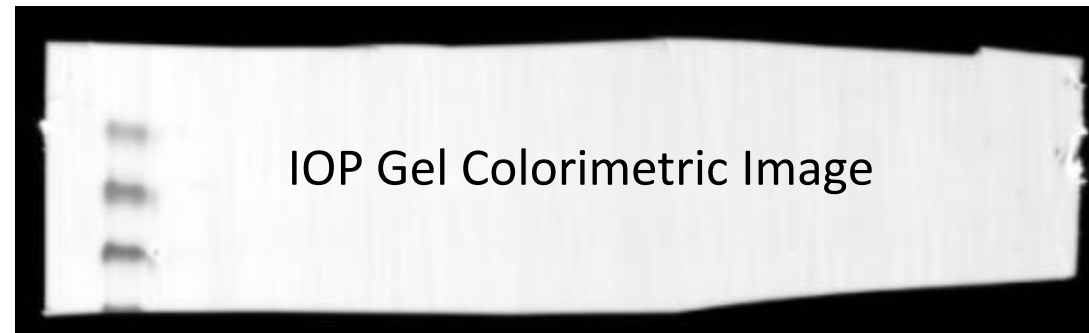

**Figure 3C CDK2-Calnexin (90kda)**

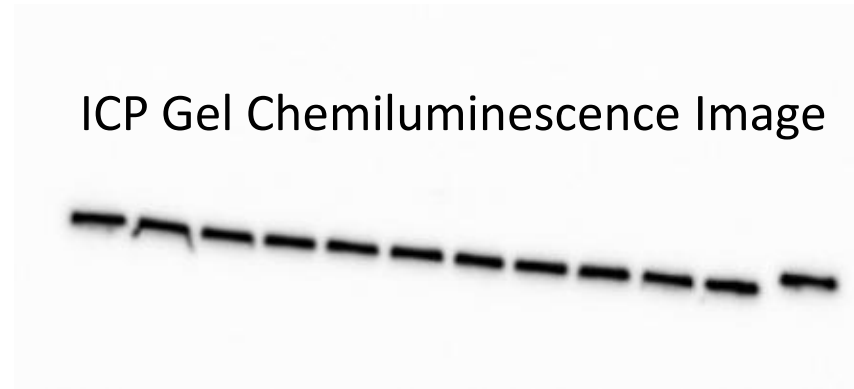

CDK2 control blot image

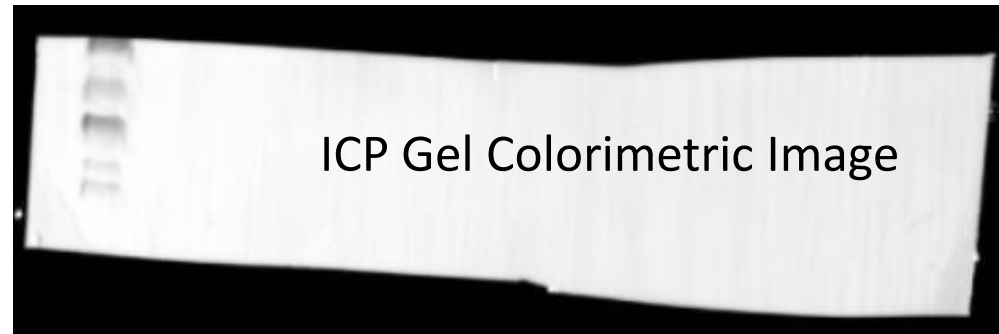

**Figure 3C CDK2 merged gel Colorimetric image**

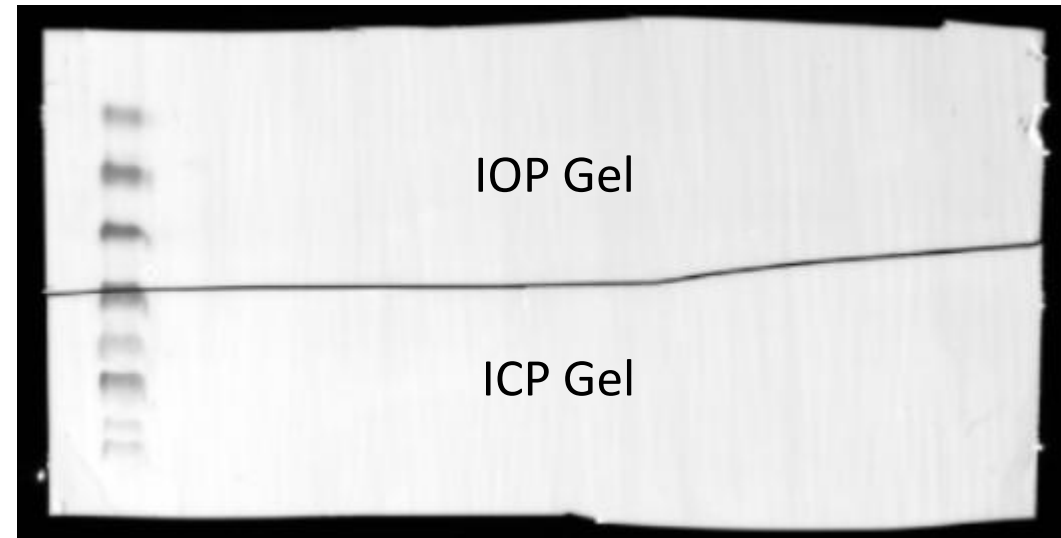



Figure 3C Cyclin E (47kda)

Cyclin E blot image presented in  
Figure 3C of manuscript

55kda Marker ←

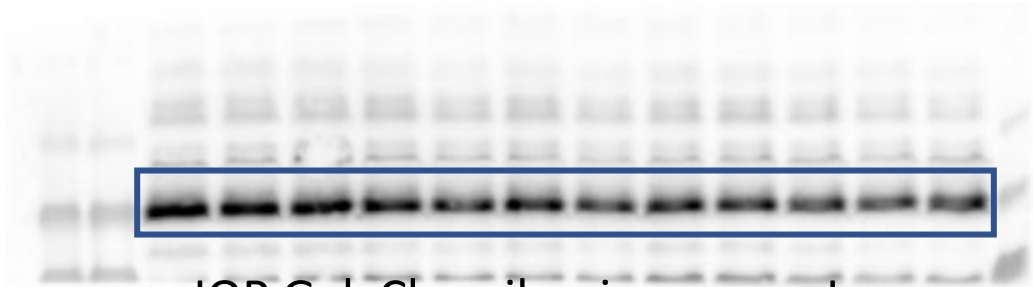

IOP Gel Chemiluminescence Image

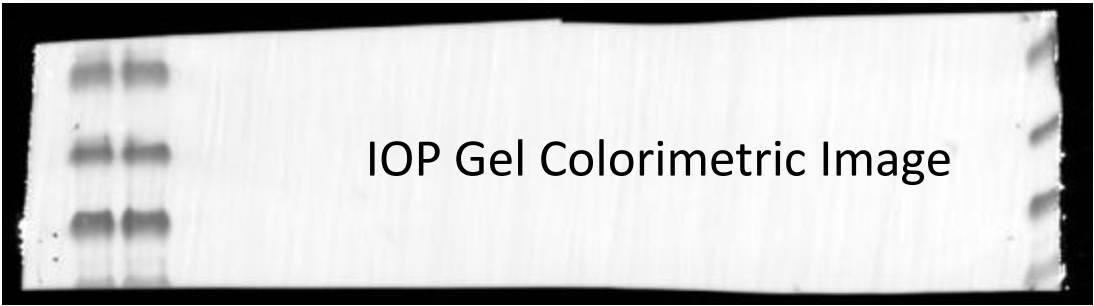

IOP Gel Colorimetric Image

Figure 3C Cyclin E-Calnexin (90kda)

100kda Marker

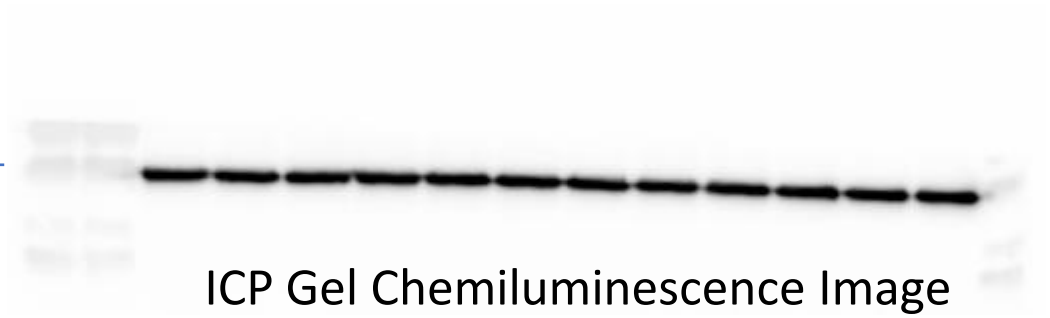

Cyclin E control blot image

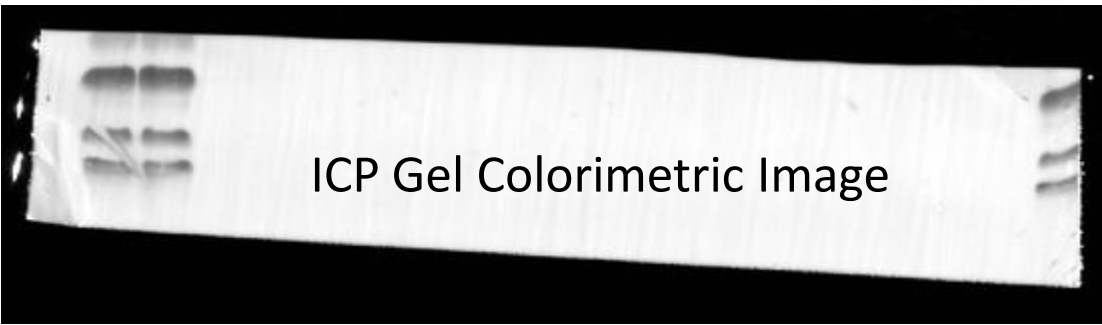

**Figure 3C Cyclin E merged gel Colorimetric image**

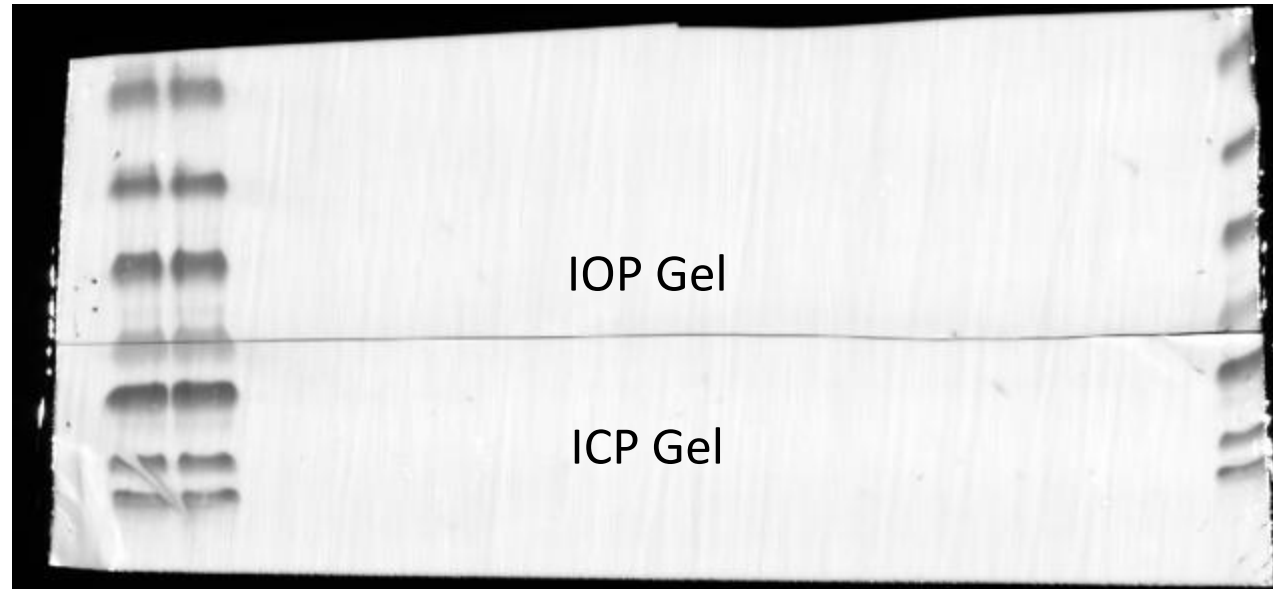

## Figure 4C MMP9 (92kda)

MMP9 blot image presented in  
Figure 4C of manuscript

100kda Marker

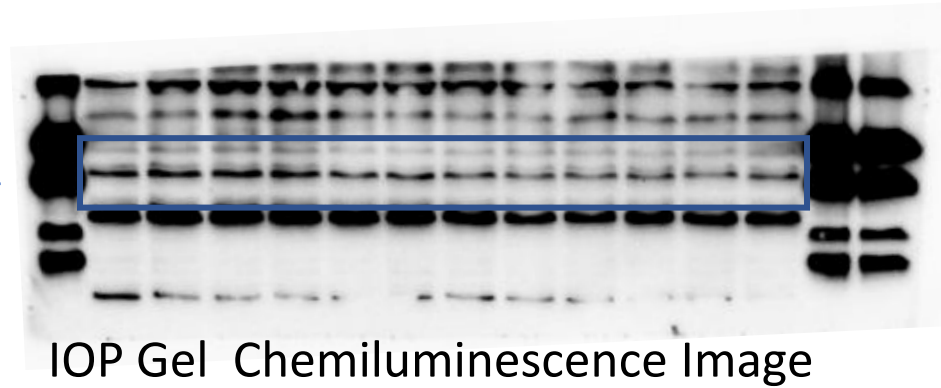

IOP Gel Colorimetric Image

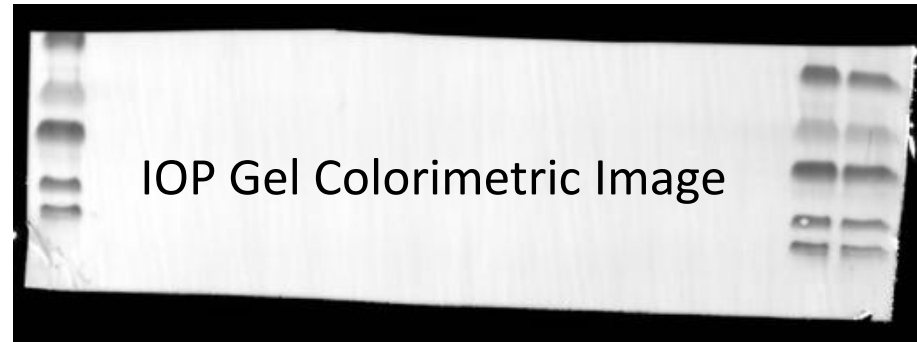

**Figure 4C MMP9-GAPDH (90kda)**

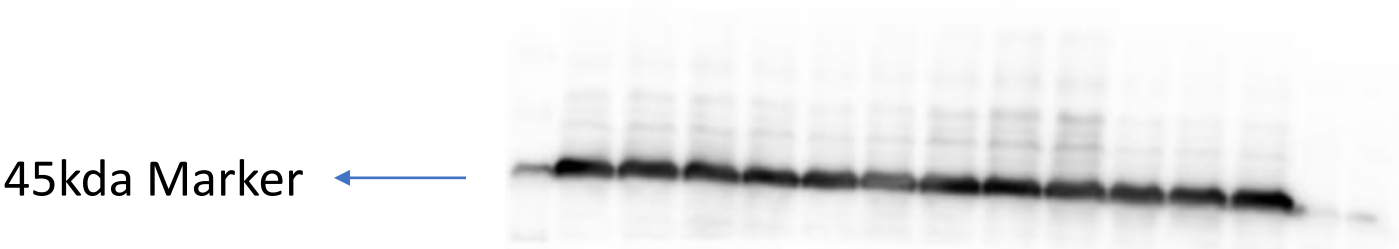

MMP9 control blot image

ICP Gel Chemiluminescence Image

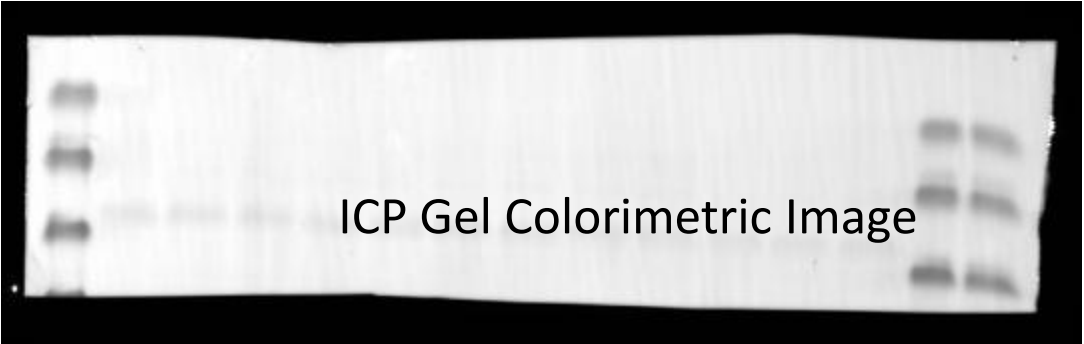

ICP Gel Colorimetric Image

**Figure 4C MMP9 merged gel Colorimetric image**

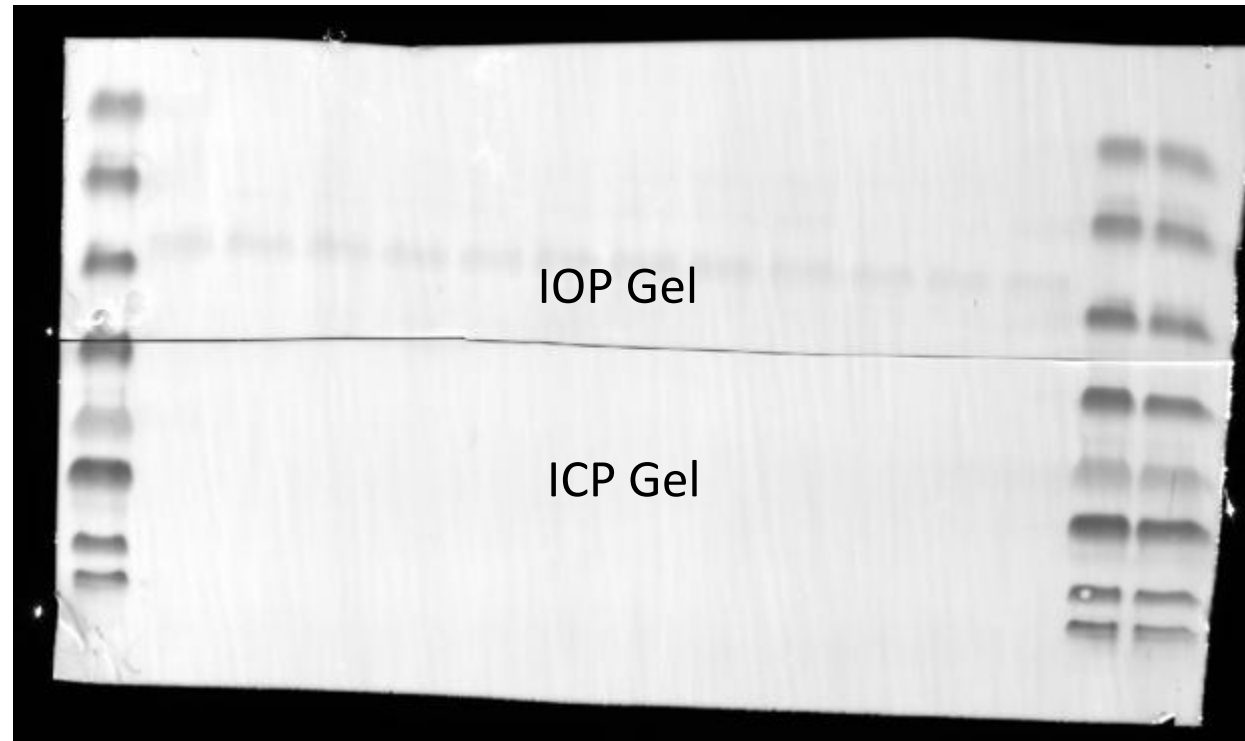

Supplement: d5ra07312j2.pdf [file d5ra07312j2.pdf]
